# Supplementary material for: Modulation of brain signal variability in visual cortex reflects aging, GABA, and behavior
Source: eLife. 2025 Apr 17;14:e83865. doi: 10.7554/eLife.83865 (PMC12005714; doi:10.7554/eLife.83865)
Supplement: Supplementary file 1. [file elife-83865-supp1.xlsx]

## Sheet: DataDictionary
Subject	Subjectt ID
DrugOrder	Order of drug and placebo - 1=drug first, 2=placebo first
DaysBetSess	Days between drug and placebo session for subset 1
Dosage	Lorazepam dosage participant received.
OnlySensory	1 if completed visual-in-noise task
Sex_M1	Subject sex. Male = 1, Female = 2
Age	(in years)
G_UNC_VV_rmqc	Visual uncorrected GABA avg. across two hemispheres after excluding flagged data
G_UNC_LVV_rmqc	Left visual uncorrected GABA after excluding flagged data
G_UNC_RVV_rmqc	Right visual uncorrected GABA after excluding flagged data
G_UNC_VV	Visual uncorrected GABA avg. across two hemispheres without excluding flagged data
G_ATC_VV	Visual tissue composition corrected GABA avg. across two hemispheres after excluding flagged data
Face_Variability	Model 1 comparing task condition - variability during face condition
House_Variability	Model 1 comparing task condition - variability during house condition
BrainScore_Placebo	Model 2 - GABA and age against modulation of variability within visual anatomical mask
VisFA	Visual task score computed as factor analysis
Mod_Placebo	Modulation of visual variability on placebo
Mod_Drug	Modulation of visual variability on drug
Mod_Change	Drug-related shift in modulation of visual variability
VisualVolume	Freesurfer based volume of visual region
Face_Placebo	Variability during face condition in placebo state
House_Placebo	Variability during house condition in placebo state
Face_Drug	Variability during face condition in drug state
House_Drug	Variability during house condition in drug state
BrainScore_Placebo_FuncMask	Model 3 - GABA and age against modulation of variability within visual functional mask from model 1
MRSBehavDaysBetween	Days between MRS and behavior session subset 3
MRSfMRIDaysBetween	Days between MRS and fMRI session subset 3
BehavfMRIDaysBetween	Days between fMRI and behavior session subset 3

## Sheet: AllSubs
Subject	Subset	DrugOrder	DaysBetSess	Dosage	OnlySensory	Sex_M1	Age	G_UNC_VV_rmqc	G_UNC_LVV_rmqc	G_UNC_RVV_rmqc	G_UNC_VV	G_ATC_VV	Face_Variability	House_Variability	LV1_Face	LV2_Face	LV1_House	LV2_House	LV1_Fix	LV2_Fix	LV1_Mod	LV2_Mod	BrainScore_Placebo	VisFA	Mod_Placebo	Mod_Drug	Mod_Change	VisualVolume	Face_Placebo	House_Placebo	Face_Drug	House_Drug	BrainScore_Placebo_FuncMask
mindo100	1	1	30	1	0	1	69	1.01586		1.01586	1.19718	2.12673	58.1663	67.7373	66611.6	99609.3	60054.7	96737.5	35905.6	62667.3	9967.52	17025.9	-159.102		-1.5485	1.50352	3.05202	71140	4.8707	3.3222	3.56811	5.07162	836.126
mindo105	1	1	57	1	0	2	79	2.03816		2.03816	1.99192	3.24909	37.6442	60.9143	47562.7	59798.2	56985.5	69951.5	38019.8	43705	17869.9	22256.5	2088.48		5.99886	-5.84778	-11.8466	61668	6.55078	12.5496	6.3997	12.2475	3723.85
mindo107	1	2	21	1	0	1	71	1.70598	1.84662	1.56534	1.70598	2.73742	75.249	73.9432	82960.3	106662	78471.3	98638.7	57801.4	77024.4	14557.1	12477.1	4160.99		14.1123	10.4969	-3.61545	53557	13.5943	27.7066	20.4379	30.9348	5158.92
mindo108	1	1	11	1	0	2	78	1.47812	1.30082	1.65543	1.47812	2.50748	74.7996	78.7311	79717.4	110689	73758.2	108743	49052.7	84683.8	8298.19	19823.4	-97.3279		-1.51668	-4.76204	-3.24536	47115	11.8668	10.3501	26.8299	22.0679	918.416
mindo109	1	2	2	1	0	2	69	1.51744	1.55186	1.48302	1.51744	2.39476	60.2582	94.5624	75086.6	90946.4	72751.4	87356.8	54697.7	65836.1	14775.8	15027.7	2280.39		6.34945	1.45126	-4.89819	60460	12.0613	18.4108	21.2124	22.6637	3790.86
mindo114	1	2	13	1	0	1	65	1.42467		1.42467	1.51499	2.36775	65.2975	84.6615	75352.2	104926	77441.7	105909	54688.3	81245	14710.5	22484.6	1504.99		4.11318	1.28178	-2.8314	58746	6.52083	10.634	4.4669	5.74869	2852.97
mindo116	1	2	5	0.5	0	2	73	1.78809	1.99739	1.57879	1.78809	3.02148	100.568	67.0688	90837.4	116868	91458.7	117355	71380	101264	19530.2	25029.6	749.179		1.40455	0.0849239	-1.31963	49776	11.8521	13.2567	11.6015	11.6864	1897.55
mindo118	1	2	16	0.5	0	2	69	1.32806	1.37375	1.28238	1.32806	2.09954	78.7324	109.328	76205.8	111539	76375.3	112614	52677.5	94093.6	13159.5	22521.6	427.214		-0.115986	-3.67668	-3.56069	52222	10.2568	10.1409	9.93274	6.25606	1033.41
mindo120	1	1	79	0.5	0	2	67	1.53049	1.41772	1.64326	1.53049	2.59582	49.1683	68.9171	56980.3	78509.1	53874.7	81468.2	34341.8	51301.6	9104.62	20303	1162.63		2.99881	0.888637	-2.11017	52835	9.43011	12.4289	8.92177	9.81041	2985.2
mindo123	1	1	6	0.5	0	2	69	1.4309	1.47665	1.38516	1.4309	2.24919	51.8407	101.982	67096.6	102519	66929.5	99800.4	42472.8	72983.6	15531.1	18625.7	-71.4186		-1.30052	-3.24482	-1.9443	61522	4.01054	2.71002	15.6936	12.4488	914.33
mindo124	1	1	4	0.5	0	1	74	1.60173	1.56482	1.63864	1.60173	2.55145	73.2535	91.5227	79505.9	102166	81470	100308	53392	72826.7	15839.3	16997.8	-335.864		-2.93261	4.48033	7.41294	65806	13.4637	10.5311	16.7352	21.2155	719.213
mindo127	1	2	3	0.5	0	2	70	1.3067	1.29461	1.3188	1.3067	2.20783	76.9162	66.6415	70982	79265.9	82614.8	94103.4	61804.5	67838.5	25898.5	31362	-1620.74		-6.95654	4.22066	11.1772	55120	19.1654	12.2088	12.0612	16.2819	-2.71751
mindo129	1	2	21	0.5	0	1	67	1.40072	1.41509	1.38635	1.40072	2.45798	64.0548	70.7804	61448.7	76367.5	68680.8	84835.2	40727.8	50218	17515.3	22435.8	437.528		0.750075	1.6279	0.877826	65616	14.3387	15.0888	15.3045	16.9324	2359.42
mindo132	1	1	6	0.5	0	1	65	1.37976	1.46749	1.29203	1.37976	2.33307	76.1966	112.03	79142.1	111319	66507.3	98424.2	43967.8	75087.4	4726.84	7703.03	1067.21		2.11821	1.35544	-0.762775	72981	5.09842	7.21663	7.16782	8.52325	1059.82
mindo139	1	2	15	0.5	0	1	74	1.19981		1.19981	1.34018	2.07823	51.8458	51.1277	52318.4	77254.1	58547.5	88328.4	33829.1	53979.4	16276.9	27186.5	409.768		1.28605	2.78064	1.49459	59361	11.2003	12.4863	8.99044	11.7711	2104.36
mindo140	1	1	13	0.5	0	1	69	1.37409	1.2241	1.52408	1.37409	2.30916	46.0806	54.7563	48899.7	91097.9	60653.7	100546	30214.1	67029.2	19666.1	28829.3	126.735		-0.0301773	2.63293	2.66311	58345	3.55442	3.52425	3.16466	5.79759	1595.51
mindo141	1	2	21	0.5	0	2	67	1.4991	1.49126	1.50694	1.4991	2.41807	68.5798	65.5596	71485	77699.7	80236.2	85503.1	53631.2	55084.5	23655.8	24030.5	2335.89		5.07785	3.70763	-1.37023	50740	20.8339	25.9117	19.7099	23.4175	3504
mindo142	1	2	5	0.5	0	2	81	1.23723	0.99125	1.48321	1.23723	2.18509	51.5393	77.4486	58279.4	80639.4	69497.6	98097.1	41397	65602.6	17202.2	38791.5	1320.98		3.78522	5.32395	1.53872	63300	9.9298	13.715	9.13198	14.4559	2968.24
mindo143	1	1	14	0.5	0	2	66	1.42073	1.0062	1.83525	1.42073	2.41434	74.7604	67.4612	69795.1	95919.4	71505.3	97729.5	45326.1	70374.6	15762.4	22839.2	-228.452		-2.21191	0.92663	3.13854	63166	12.871	10.6591	10.1219	11.0485	840.475
mindo144	1	1	2	0.5	0	2	69	1.63918	1.88365	1.39471	1.63918	2.70408	42.7548	50.5269	47908.8	57078.2	49644.8	58699	30051.3	36510	14120.1	17168.9	1440.73		2.80494	4.35384	1.5489	55036	11.7254	14.5304	10.2925	14.6464	2916.56
mindo150	1	2	14	0.5	0	2	67	1.46431	1.38131	1.54731	1.46431	2.47687	42.676	75.0939	45542.2	73420.4	57400	74890.1	35258.9	52350.6	20871.8	18311.6	2398.93		5.7799	3.43253	-2.34737	58354	7.05639	12.8363	8.86766	12.3002	3604.51
mindo151	1	2	7	0.5	0	2	65	1.25723	1.12592	1.38855	1.25723	2.18985	53.3267	66.7124	55747.4	79643.4	60893.2	79079.5	38925.8	61413.9	18493.7	19067.8	3037.56		6.55336	5.75009	-0.803275	53089	9.49164	16.045	14.3314	20.0814	3865.45
mindo152	1	2	10	0.5	0	1	71	1.22126	1.12589	1.31663	1.22126	2.12486	76.6562	52.4649	67507.7	95797.7	77519.9	109954	47383	77183.5	20858.7	45527.9	133.984		0.0968843	3.77433	3.67744	67501	10.317	10.4139	10.6384	14.4127	2025.2
mindo153	1	2	18	0.5	0	2	69	1.69386	1.67814	1.70958	1.69386	2.71463	93.9139	65.4013	92636.7	99327.5	92764.8	99681.1	75727.7	71472.6	19792.7	21206.9	2111.76		5.00828	-0.580054	-5.58833	57102	30.5626	35.5708	36.9218	36.3417	3799.9
mindo154	1	2	6	0.5	0	2	65	1.31588	1.27976	1.35199	1.31588	2.33085	63.9736	71.4226	67773.6	91930.8	67836.2	88182.7	39114	55907.9	16997.3	17727.6	2854.19		7.24625	9.20432	1.95807	63439	11.2481	18.4944	11.6989	20.9032	3496.32
mindo155	2				0	2	66	1.34844	1.1719	1.52497	1.34844	2.3255	45.2937	110.538	55355.6	69710.7	66382.4	79120.3	39193.2	47441.5	21206.8	22859.5	2347.51					65918					4166.32
mindo156	2				0	1	70	1.48657	1.34993	1.62321	1.48657	2.53239	53.0514	65.1454	59600.3	77476.7	59362.1	73258.4	41510.2	52417.6	12358.4	13985.9	1209.14					65923					2523.3
mindo157	2				0	1	74	1.12257	0.940903	1.30424	1.12257	2.32705	63.9056	54.9726	60173.2	80245.1	62469.3	78190.9	35792.3	47737.3	14681.2	15872.8	977.876					60247					2202.54
mindo158	2				0	2	71	1.44121	1.39367	1.48876	1.44121	2.40071	33.9511	64.9366	44994.5	64242.5	53230.2	70024.9	29549.7	41889.1	15196.7	19746.6	1296.89					60611					2327.41
mindo159	2				0	2	75	1.55726	1.62932	1.4852	1.55726	2.61971	62.3391	83.8167	60255.3	73846.6	62738.1	87026.5	39544.4	47915.8	12581	30441	1656.15					54556					3083.41
mindo160	2				0	1	70	1.78854	1.73208	1.845	1.78854	3.01629	43.6968	45.1047	60244.7	67991.8	67446.4	74354.8	41610.3	44317.7	17888.2	19452.2	2155.61					63531					3924.92
mindo161	2				0	1	74	1.65228	1.49664	1.80792	1.65228	2.66255	62.0987	78.8149	56416.2	64340.6	58998.5	78605.9	39658.1	49581.7	14411.9	26389.1	79.7283					72959					1783.12
mindo162	2				0	2	65	1.49226	1.4612	1.52333	1.49226	2.67145	50.5254	47.4024	56493.6	87857.9	56207.9	81637.9	33728.5	57486.1	13531	13384.4	1602.13					58456					2420.61
mindo163	2				0	2	76	1.29448	1.21632	1.37265	1.29448	2.34254	62.7668	69.1296	60585.5	91592.5	73121.9	102594	44234.2	71905.4	24154.1	32497.6	474.265					57724					2232.8
mindo164	2				0	2	75	1.07105	0.925857	1.21625	1.07105	2.14096	45.1111	87.8424	35704.2	62725.3	31409.2	62051.3	20934.4	44694.8	8654.93	16313.7	490.176					64941					1505.56
mindo165	2				0	1	69	1.42911	1.26211	1.59611	1.42911	2.6073	66.8634	65.0185	61046.1	87764	63572.1	86932.5	41354.6	64607.9	16975.9	16861	1988.91					73285					3258.18
mindo166	3				1	2	87	1.43632	1.46758	1.40506	1.43632		49.5131	58.9172	50627.5	79236.9	53868.8	79514.4	36927.9	59136	15016.1	17375.2	2179.89	0.0380959				46959					3267.59
mindo168	2				0	2	78	1.07867	1.04111	1.11624	1.07867	2.42827	50.7108	93.8427	36837.3	75259.7	39271.5	78936.1	21685	55903.5	12114.9	19555.4	545.145					57098					1863.37
mindo169	2				0	1	77	1.22725	1.18134	1.27315	1.22725	2.29918	59.5926	93.2187	66316.1	92115.7	69330.4	96427.6	44151.7	66935	16472	24974.7	1693.45					62992					3021.58
mindo170	2				0	2	67	1.39449	1.4051	1.38388	1.39449	2.50532	39.0939	89.9011	53392.9	72186.1	63909.4	78664.1	41141.9	51135.2	18818.6	22636.3	1437.82					61875					2238.78
mindo172	3				1	2	65	1.78261	1.58265	1.98257	1.78261	2.9259	71.2115	69.9738	71437	103995	79384.9	110223	48386	79515.7	17447.2	39010.5	807.089	0.257822				59741					2902.69
mindo176	3				1	1	65	2.0719	1.9136	2.2302	2.0719	3.13929	43.2551	50.2928	55921.3	76022.4	55525.6	73926.5	35684.6	48482.4	11388.4	15047.8	461.062	1.60428				61562					1519.46
mindo178	3				1	2	70	1.35192	1.28631	1.41752	1.35192	2.28707	48.4257	72.3351	54339.1	60522.8	48118.5	56194.7	33817.8	36865.4	9958.26	14067.2	2051.47	1.32777				64497					2496.41
mindo180	3				1	2	71	1.95401	1.93969	1.96832	1.95401	3.1861	55.5563	62.1663	58569	89090.8	64172	86701.7	37701.5	62036.8	15961.1	15785.3	1584.44	0.901847				56220					2809.51
mindo182	3				1	2	67	1.62399	1.50471	1.74328	1.62399	2.59277	61.2679	72.8095	58629.6	87501.5	52926.7	88362.6	33219.6	61155	7152.21	21247.7	263.054	0.520522				67049					1111.08
mindo189	3				1	2	67	1.52739	1.37679	1.678	1.52739	2.66777	57.2836	64.1224	78800.6	104719	76078.2	101585	47054.6	67269.7	10545.5	15281.1	964.468	-0.464583				61796					1885.19
mindo190	3				1	2	70	1.53643	1.41993	1.65294	1.53643	2.53906	54.7846	68.598	58934.9	74864.9	69071.2	79999.9	41075.1	52960.3	19768.1	19503.5	1573.42	-0.314111				57881					3481.98
mindo195	3				1	1	67	1.50692	1.34713	1.66672	1.50692	2.56578	56.9225	55.2438	61758.4	81595.5	74898.4	96873.3	40676.6	60338	22219.7	35123.8	1793.67	1.28944				58871					2878.08
mindo200	3				1	2	66	1.51945	1.51997	1.51894	1.51945	2.46576	72.8633	126.146	70132.5	79456.5	64352	72519.5	45710.7	48972.7	11544.4	12025.2	2423.51	2.03905				57299					4001.28
mindo205	3				1	2	65	1.57365	1.39583	1.75148	1.57365	2.73671	43.7413	45.8215	51550.7	66935.5	56594.1	69820.3	30942.9	39056	14846.2	17703.7	711.43	-1.79433				54684					2109.29
mindo208	3				1	2	79	1.27813	1.10751	1.44875	1.27813	2.19274	54.8191	88.8156	56919.2	78245.6	54041.3	74951.5	32412	47805.6	11673	15923.9	2002.41	-1.2864				63955					3092.81
mindo209	3				1	2	66	1.60409	1.51938	1.68881	1.60409	2.76688	57.6417	51.3669	46656.6	50488	56151.1	55694.5	35965.7	34474.8	19841.4	18264.1	2304.3	-0.044213				56017					3258.23
mindo212	3				1	2	68	1.60215	1.41868	1.78562	1.60215	2.64028	116.823	61.4677	96763.1	124909	99381.6	127143	86243.9	117651	47689.7	64724.3	-193.507	-1.19048				63429					1617.49
mindo213	3				1	1	70	1.53399	1.61401	1.45397	1.53399	2.78712	46.4669	59.2879	65852.7	90596.4	58220.1	81670.7	40182.8	59288.2	9728.35	12734.3	1670.89	-0.203865				61420					2612.97
mindo216	3				1	2	72	1.37743	1.20052	1.55433	1.37743	2.48306	40.6897	65.0375	51311.9	61461	50504.6	51454.5	31928	33906.6	13969.1	11757.8	2973.42	0.252612				59540					3927.42
mindo217	3				1	2	68	1.49222	1.35035	1.63408	1.49222	2.47571	43.3715	69.091	47507.6	65680.7	61578.6	79983.4	42925.7	55040.5	23233.8	27253.5	1369.01	0.963882				67142					3056.92
mindo218	3				1	1	66	1.38226	1.10707	1.65745	1.38226	2.77739	34.4371	53.4618	49474.5	57376.6	50014.1	52429.3	32051.4	34836.3	12636.6	13425.2	2213.95	0.593585				67978					3456.41
mindo219	3				1	1	75	1.39324	1.23438	1.55209	1.39324	2.35584	70.5271	82.9463	63046.7	88752	72749.9	98312	42377.6	65524.2	19702.1	27750.4	666.164	-2.044				60150					2387.44
mindo220	3				1	1	65	1.49614	1.53709	1.4552	1.49614	2.59962	61.8244	65.5996	68051	95634.2	70003.1	97876.5	39265.7	65243.4	13959.4	19896.2	648.238	-1.57055				74400					2209.48
mindo225	3				1	2	84	1.02999	0.683371	1.37661	1.02999	1.95441	44.2322	36.6603	51832	78901.9	58448.1	81369.6	35948.9	54612.1	17069.9	19165.8	1830.25	-0.823055				62994					3312.8
mindo227	3				1	2	66	1.22029	1.27136	1.16922	1.22029	1.99176	53.2361	67.588	73533.2	88949.5	75410.2	91315.5	50542.8	59980.7	13284	20417.9	1695.23	0.680284				79473					2899.05
mindo228	3				1	1	76	1.00855	0.856918	1.16018	1.00855	2.2156	55.6846	66.7402	61413.4	96265.8	81510.7	118026	52416.8	90134.3	39449.1	69139.1	122.202	-2.04994				60700					1952.29
mindo230	3				1	2	71	1.60388	1.46521	1.74255	1.60388	2.68527	67.2375	88.7644	70591.1	94951	82418.3	103595	54806.4	76020.7	26700.9	31212.8	1397.17	0.60295				53754					3361.39
mindo231	3				1	2	72	1.23875	1.27626	1.20124	1.23875	2.14657	52.4624	48.5657	57405.2	83284.6	78881.7	110689	50793.9	83253	33011.3	68043	28.6224	-1.15571				58275					2046.8
mindo232	3				1	2	66	1.58907	1.38269	1.79544	1.58907	2.68038	63.4879	43.7452	69618.2	91891.6	58521.9	74324.9	41906	59807.3	8988.67	8211.97	1812.16	-0.0644726				61088					2772.41
mindo233	3				1	2	65	1.57522	1.69493	1.45551	1.57522	2.46082	105.848	55.7296	98124.8	117955	98835.3	115128	84506.4	103243	22153.6	16457.5	1468.94	1.78539				62494					2331.39
mindo235	3				1	2	65	1.37361	1.3115	1.43571	1.37361	2.74569	54.9001	63.0739	49746.2	61130.9	52745	66083.2	32063.6	39721.4	14785.7	20836.6	1365.34	1.43314				53896					3203.84
mindo238	3				1	1	72	1.30663	1.32457	1.28869	1.30663	2.53165	47.4859	47.676	44849.9	74409.5	67097.7	108560	36649.3	76479.5	29093.1	76976.7	834.525	-1.0482				61078					3391.56
mindo241	3				1	2	68	1.66133	1.39267	1.92998	1.66133	2.89513	82.4283	67.5687	79629	107882	79227	111310	53608.7	86731.5	11104.4	35253.1	650.123	-0.746358				54439					1631.88
mindo242	3				1	2	79	1.41209	1.37261	1.45158	1.41209	2.40924	51.6779	116.283	54879.6	75398.8	56109.5	82748.1	35863.6	59894.4	12362.1	28306.2	1312.3	-1.46571				59507					2248.21
mindo245	3				1	2	66	1.4924	1.48134	1.50346	1.4924	2.48722	55.0567	42.0396	64567.7	90414.8	73657.8	99447.8	44767.4	66813.7	17862.4	27715	387.013	1.55348				65450					1914.62
mindo251	3				1	1	67	1.07206	0.837544	1.30658	1.07206	2.11612	134.623	146.9	88135	108771	93435	112066	73511.2	91091.5	28284.4	30012.3	-1563.09	-1.24781				71955					-538.979
mindo252	3				1	2	65	1.76238	1.58057	1.9442	1.76238	2.86588	39.5126	45.798	36038.6	40730.6	42181.5	42363	26551.1	27496.7	15617.1	15655.8	2126.16	2.08171				57580					3093.28
mindo253	3				1	1	73	1.28755	1.14255	1.43254	1.28755	2.24628	54.119	55.2309	52157.2	93903.5	52645.2	96363.6	28349.2	67581.7	11034.5	21110.1	645.635	-0.732215				66002					1356.87
mindo254	3				1	2	70	1.58909	1.31331	1.86486	1.58909	2.79447	38.9278	64.5801	45077.9	53440.6	70540.5	78576.7	44391.4	46189.4	31785.6	33848.3	2044.08	1.0579				60950					4329.6
mindo255	3				1	2	66	1.63416	1.51462	1.7537	1.63416	2.67241	56.6341	114.988	61916.7	82681	81485.1	96906.1	52512.6	64274.3	31210.8	33787.7	1909.02	0.394591				65383					3076.35
mindo256	3				1	2	79	1.12092	1.23755	1.00428	1.12092	2.37674	67.714	41.563	60879.7	89025	54496.6	93066.9	35950.7	69618.9	6290.28	26261.4	-284.304	-0.023196				56022					761.58
mindy101	1	1	52	1	0	2	21	1.84398	1.81163	1.87633	1.84398	2.96831	51.4987	79.9222	62811.3	63212.3	77455.4	73879.7	44529.2	42340.6	25373.9	19619.2	3249.28		10.2491	1.50271	-8.74643	72954	11.0394	21.2885	12.5811	14.0838	4836.29
mindy102	1	1	37	1	0	1	20	1.7413	1.50679	1.97581	1.7413	2.60308	59.1325	83.1584	75704.3	95749.8	71894.6	86305.1	48379.5	65765.4	11967.7	11213.1	2365.43		5.33503	5.39505	0.0600266	74884	16.53	21.8651	15.1359	20.5309	3479.49
mindy103	1	1	48	1	0	2	23	1.88341	1.75986	2.00695	1.88341	2.87929	100.245	78.0884	81170.4	97409.5	76579.5	88027.7	58636.7	69799.8	14514.6	10347.2	4068.23		10.9821	13.3199	2.33782	61368	16.3325	27.3146	11.6333	24.9531	5246.24
mindy104	1	1	6	1	0	2	26	1.68874	1.51002	1.86746	1.68874	2.64124	73.6701	67.0932	64822.8	75257.2	63586.1	75508.3	43091.5	52034.5	14609.8	16699.2	2473.22		6.47624	6.47178	-0.00446272	59611	10.555	17.0313	15.7943	22.2661	3600.61
mindy106	1	1	13	1	0	2	28	1.48847	1.38475	1.5922	1.48847	2.38291	73.6496	82.8543	82344.9	79678.3	82292.3	83358.1	61782.4	56004.4	16503	20033.9	1974.35		4.38243	10.3958	6.01333	61718	14.032	18.4145	7.13388	17.5296	3044.55
mindy110	1	1	58	1	0	2	22	1.9068	1.88062	1.93298	1.9068	2.91519	78.3454	69.2547	93621	99181.9	91782.3	91946.9	67990.9	65315.8	13952.3	13062.5	858.819		1.40536	4.61882	3.21346	68010	13.1805	14.5858	8.33469	12.9535	1797.41
mindy111	1	2	7	1	0	2	22	1.53159	1.53092	1.53226	1.53159	2.27148	101.962	104.75	104231	119264	100943	119019	92800.9	102795	5567.01	25231.3	-25.2612		-1.23755	-6.75526	-5.51771	64311	12.1646	10.9271	26.5122	19.7569	845.668
mindy112	1	2	3	0.5	0	1	26	1.60091	1.54358	1.65824	1.60091	2.5614	82.599	93.305	86346.2	93940.7	93135.4	96031.2	68656.8	66637.2	22484.3	17876.2	3742.61		11.5487	7.40571	-4.14297	69131	10.4659	22.0146	22.6886	30.0943	5095.22
mindy113	1	1	28	0.5	0	2	22	1.703	1.66432	1.74168	1.703	2.70598	62.0786	71.1831	77641.5	65821.8	81270.5	66576.2	53743.5	37343.9	22019.4	13647.4	4093.08		12.0442	4.40366	-7.64056	65232	17.3225	29.3667	25.9963	30.4	5496.65
mindy117	1	2	28	0.5	0	2	22	1.70584	1.69634	1.71533	1.70584	2.57422	48.0996	90.4999	71744.9	83293.7	75070.1	89630.4	55204.5	61109.3	18638.7	22394.2	3040.93		8.91378	14.9098	5.99601	75471	14.1718	23.0856	11.9329	26.8427	4172.22
mindy119	1	2	7	0.5	0	2	19	1.77372	1.94887	1.59857	1.77372	2.6744	69.4772	81.6875	103356	109848	96835.5	100442	75604.3	73306.8	9038.34	9887.3	2681.65		5.88706	2.09864	-3.78842	68294	12.5231	18.4101	13.6549	15.7536	3990.16
mindy125	1	1	28	0.5	0	2	29	1.80589	1.71894	1.89284	1.80589	2.82034	69.2548	68.4905	63402.3	72066.9	80193.8	89461.5	53464.4	58618.8	29294.9	32303.3	2073.2		5.71711	5.74595	0.0288401	59439	7.87672	13.5938	7.63691	13.3829	3381.38
mindy126	1	2	14	0.5	0	1	29	1.59505	1.59505		1.50061	2.50598	73.4628	94.7689	76426.1	95415.5	82061.8	101037	57222.7	73853.2	20838.7	26591.3	1601.31		2.97953	13.085	10.1055	62139	15.0875	18.067	11.1252	24.2102	3566.09
mindy128	1	1	29	0.5	0	2	25	1.83938	1.88101	1.79774	1.83938	2.82199	60.9527	53.525	60286.1	68577.1	56444.1	59385	38916	42985.3	11459.3	12878.6	2245.71		4.77226	2.7907	-1.98157	63431	10.3705	15.1427	13.8204	16.6111	2550.38
mindy131	1	2	5	0.5	0	2	20	1.54419	1.46666	1.62171	1.54419	2.42034	66.0336	73.737	81454.6	87510.2	81439.2	87623.9	55953.4	58339.5	14910.9	16412.5	1298.2		1.94479	11.9769	10.0321	61409	17.7769	19.7217	11.4446	23.4216	3319.65
mindy134	1	1	39	0.5	0	1	20					2.48808	55.981	124.61											5.97954	5.90111	-0.0784316	71578	10.87	16.8495	13.7521	19.6532
mindy135	1	2	5	0.5	0	1	23	1.22153		1.22153	1.35707	2.15781	82.603	109.868	86266.2	93223.5	97771.9	108098	69607.5	71437.7	47412.7	47257.3	3303.9		11.8126	12.62	0.807383	82465	11.2168	23.0295	13.1851	25.8051	4311.58
mindy137	1	1	3	0.5	0	1	27	1.32346	1.32346		1.12006	2.27016	75.3931	69.9759	78166.7	80988.7	80825.9	85257.9	55497.4	53544.3	19993.3	21400.7	1760.59		3.4864	7.67271	4.18631	68392	13.1798	16.6662	10.0892	17.762	2890.2
mindy138	1	2	24	0.5	0	1	25	1.58574	1.42293	1.74855	1.58574	2.46942	69.9268	105.478	99820.6	113484	99386.5	109495	83048	88185.2	15903.1	13613.8	3314.55		8.2225	1.82162	-6.40088	78044	11.5347	19.7572	9.99241	11.814	4452.65
mindy145	1	2	21	0.5	0	2	20	1.59242	1.6341	1.55075	1.59242	2.47719	51.3385	119.39	79487	100686	93421	111870	60849.2	73859.1	37440.9	45926.1	1262.49		2.22336	-2.14845	-4.37181	64430	18.5193	20.7427	12.1233	9.97482	2575.08
mindy147	1	1	7	0.5	0	1	24	1.53892	1.4451	1.63273	1.53892	2.42378	54.9779	88.4893	93359	119760	89779.1	111153	76026.1	97420.5	11920.9	11360.4	1449.77		2.8553	4.19407	1.33877	79597	6.58425	9.43955	9.89398	14.0881	2612.84
mindy167	2				0	1	21	1.83488	1.69272	1.97705	1.83488	2.94611	65.1889	84.4488	81030	74111.7	94369.2	85975.7	65330.1	51441.6	33182.5	23941.5	1821.6					59094					4098.7
mindy171	3				1	2	21	1.28216	1.44974	1.11459	1.28216	2.06468	103.605	67.9191	67974.9	84051.6	68116.4	76400	45622.1	56580.9	14221.4	12080.1	3183.58	1.01036				59099					4458.77
mindy179	3				1	2	19	1.79609	1.51985	2.07232	1.79609	2.75745	108.683	77.9425	75460.9	82037.9	84849.5	83526.1	55577.1	51728.6	24357	17950.5	1780.72	-1.19689				69532					3353.38
mindy181	3				1	1	19	1.77118	1.63535	1.90702	1.77118	2.84354	88.6946	78.1637	84325.6	91697.4	82248.9	93845.3	62540.5	67003.1	15213.5	20284.5	2476.56	0.064607				75152					3067.02
mindy183	3				1	1	25	1.73455	1.64445	1.82466	1.73455	2.77986	69.6704	62.4428	88197.5	101947	80996.1	87831.8	61903.3	67932.5	7013.75	8104.62	1796.87	1.58887				74011					2574.02
mindy184	3				1	2	25	1.54611	1.39954	1.69269	1.54611	2.40237	56.897	69.6913	91611.7	103444	77931.1	75836.3	64618.2	62323.8	7182.17	2249.53	4364.89	-1.04793				61615					5154.37
mindy185	3				1	1	23	1.58495	1.51914	1.65075	1.58495	2.46489	70.7477	85.0685	83568.1	71942.2	91174.9	77980.3	62874.7	48456.5	24627.2	22083.8	2005.36	-1.19327				63773					3017.04
mindy187	3				1	2	27	1.7422	1.78004	1.70435	1.7422	2.71448	45.4614	68.5419	74374.2	86570.5	78628.2	89415.1	48764.4	55509.3	14950	18495.3	2755.69	1.57277				57751					4411.74
mindy188	3				1	1	26	1.62489	1.43829	1.81149	1.62489	2.61082	80.4469	110.922	98960.8	119167	95766.4	117820	84755.8	103260	6502.48	19093.1	954.437	1.40657				76101					2019.8
mindy191	3				1	1	21	1.73295	1.58612	1.87977	1.73295	2.66656	59.7722	57.1702	71055.6	62705.2	70107.6	57017.2	45104.8	36019.6	15068.3	12243.4	3618.46	-0.480901				71565					4308.59
mindy192	3				1	1	23	1.64324	1.5198	1.76668	1.64324	2.52034	76.0467	81.1391	92777.9	112171	86918.7	107629	73719.3	92042.6	9367.34	16632	504.413	0.0921343				74737					1276.54
mindy193	3				1	1	27	1.75165	1.84393	1.65938	1.75165	2.83854	56.2085	67.5014	73929.1	85142	74181.3	85365.6	47837.4	54957.9	13498.5	16010.8	2931.08	0.956817				57700					3958.59
mindy194	3				1	2	18	1.699	1.51352	1.88448	1.699	2.55524	81.8241	73.7783	71053	67404.6	70393.3	61919.3	49023.3	40797	16156.1	11817	2623.12	-1.41541				71700					4401.98
mindy196	3				1	1	21	1.79046	1.82868	1.75223	1.79046	2.84652	46.337	93.4119	79808.6	94312.7	80359.4	87244.5	62124.3	67316.3	18490.7	9810.18	5054.84	0.018162				82648					5542.61
mindy197	3				1	2	21	1.7792		1.7792	1.7906	2.70367	80.3878	89.0345	84165.5	91017.2	95012.2	96694.8	68372.6	62828.2	31893.7	21820.2	3746.56	1.39356				64947					4488.62
mindy198	3				1	2	22	1.78088	1.75732	1.80445	1.78088	2.81144	66.7216	76.2115	88959.9	97855.3	83027.5	88394.6	62862.2	62227	10994.1	10974	2332.11	1.11833				62645					3370.81
mindy202	3				1	1	22	1.90011	1.65418	2.14604	1.90011	2.95599	56.4704	69.2769	67547	61550.3	71162.5	64535.8	42347.3	34227.8	18128.8	15568.9	2546.7	1.5417				75522					4508.17
mindy204	3				1	1	24	1.39834	1.36522	1.43145	1.39834	2.40292	73.9942	116.445	96875.9	107423	100977	114475	89938	94738.2	43720.7	42252.8	1057.78	1.1025				79391					3156.93
mindy206	3				1	1	22	1.57855	1.39087	1.76623	1.57855	2.51235	58.7918	81.2745	92875.3	95777.7	91981.8	88510.5	61725.9	55193.5	21128	15361.2	3067.38	-0.270349				74235					4124.29
mindy210	3				1	2	19	1.68132	1.56609	1.79655	1.68132	2.6811	86.879	54.9584	58080.1	64181.1	60292.9	55270.4	37815.4	34911.9	16219.9	9925.94	3941.44	-1.6401				65275					5386.98
mindy211	3				1	1	22	1.59555	1.33151	1.8596	1.59555	2.54701	43.2651	77.4269	89543.6	90365.8	93899	92285.4	61513	56226.9	17511.3	19210.3	1846.2	-1.19518				69551					3225.02
mindy214	3				1	2	22	1.68259	1.64668	1.71851	1.68259	2.63373	57.6762	83.2067	86784.6	80985.3	77105.7	70524.3	58946.9	46097.4	12202.4	7583.55	4878.34	-0.732172				59029					5684.2
mindy215	3				1	1	24	1.71536	1.62319	1.80753	1.71536	2.80308	57.7478	72.5761	98051.1	105050	86513.4	86604.4	67869.4	64090.2	4537.22	5486.82	1758.81	1.02198				71817					2176.54
mindy221	3				1	2	21	1.59433	1.50729	1.68137	1.59433	2.47862	65.3342	62.9028	70989.8	70460.2	77158.1	83236.2	44952	45031.2	18056	23550.1	1028.73	-1.3724				67387					2760.51
mindy222	3				1	1	27	1.8689	1.78494	1.95285	1.8689	2.93869	66.6912	61.6003	62038.3	64188	69530.4	61211.8	42774.2	40020.4	18955.4	13242.4	3476.07	1.31534				68917					4357.26
mindy223	3				1	1	24	1.63657	1.63848	1.63466	1.63657	2.60424	67.7944	63.5336	74359.6	94513.6	76649.9	89206.3	48596.9	60869.1	17151.2	16536.9	2138.99	-1.39331				78696					2959.89
mindy224	3				1	2	21	1.88383	1.6753	2.09235	1.88383	2.92498	72.2887	84.5112	85739.8	96334.3	94626.9	98303.1	71136.5	70121.7	25633.7	18921.2	4455.71	1.11983				65350					4802.15
mindy226	3				1	1	25	1.69248	1.58057	1.80439	1.69248	2.75981	81.2252	68.7119	62497.4	75874.7	75245.8	79512.9	48397.8	52440.9	23450.2	18912.4	2482.69	-0.469608				71698					3880.28
mindy234	3				1	2	22	1.81421	1.81673	1.81169	1.81421	2.76065	50.8416	86.7617	80684.9	86421.6	88157	83262.7	59918.5	55729.1	22850	13086.3	4109.9	-0.139254				65188					5445.81
mindy236	3				1	1	18	1.75256	1.62598	1.87914	1.75256	2.82992	70.1009	170.827	100338	124003	97739.7	120154	83464.5	105871	8737.15	15950.4	3922.66	2.63363				63768					4721.19
mindy237	3				1	1	26	1.69821	1.5536	1.84282	1.69821	2.81303	73.1291	54.7216	67423	75027.5	70138.7	81406.7	40915.2	48147.4	15013	21877	2309.58	0.39193				66813					3447.35
mindy239	3				1	2	24	1.59581	1.59323	1.59839	1.59581	2.65688	136.192	134.706	97202.5	123700	90001.6	118967	77290.3	111492	6835.37	18613.3	1019.67	-1.83578				65973					1812.88
mindy240	3				1	1	26	1.4455	1.39423	1.49678	1.4455	2.37555	55.1698	64.8509	65631.1	69255.1	76397.6	70366.5	46483.8	44812.4	22427	17092.9	3105.95	-1.61999				68152					4950.86
mindy243	3				1	1	19	1.65116	1.47577	1.82655	1.65116	2.64576	53.7168	65.4887	79839.1	95121.4	86356.2	91347.2	58848.5	63870.4	23976.9	18407.9	1603.09	-0.761454				77414					2613.77
mindy248	3				1	2	21	1.37928	1.18069	1.57787	1.37928	2.51592	64.5955	61.9641	77294.8	89323.4	64258.5	71877.8	48877.3	54154.4	7579.98	9015.65	2664.81	0.955993				67491					3121.41
mindy249	3				1	2	19	1.54497	1.49744	1.59251	1.54497	2.3925	45.0384	166.844	93926.1	115483	98954.1	120155	83953.5	104293	38064.3	46199.6	3865.63	-1.43832				62496					5579.02
mindy250	3				1	2	20	1.97303	1.73241	2.21365	1.97303	3.13333	82.5496	44.3844	63444.1	65713.9	70042.4	63361.7	42599.9	40580.9	17501.8	13998.5	1899.81	-0.826112				60171					3182.19

## Sheet: Subset 3 - Days Between Session
Subject	MRSBehavDaysBetween	MRSfMRIDaysBetween	BehavfMRIDaysBetween
mindo166	13	6	7
mindo172	11	5	6
mindo176	18	8	10
mindo178	30	21	9
mindo180	21	19	2
mindo182	37	27	10
mindo189	21	14	7
mindo190	14	7	7
mindo195	21	14	7
mindo200	25	12	13
mindo205	6	5	1
mindo208	27	26	1
mindo209	36	35	1
mindo212	78	4	74
mindo213	15	9	6
mindo216	20	10	10
mindo217	18	9	9
mindo218	27	8	19
mindo219	9	7	2
mindo220	9	2	7
mindo225	21	7	14
mindo227	26	7	19
mindo228	4	3	1
mindo230	18	11	7
mindo231	20	7	13
mindo232	21	15	6
mindo233	12	6	6
mindo235	15	14	1
mindo238	19	16	3
mindo241	25	7	18
mindo242	16	10	6
mindo245	23	16	7
mindo251	4	1	3
mindo252	8	6	2
mindo253	9	7	2
mindo254	16	8	8
mindo255	7	5	2
mindo256	23	15	8
mindy171	4	1	3
mindy179	63	61	2
mindy181	16	8	8
mindy183	29	15	14
mindy184	21	19	2
mindy185	35	14	21
mindy187	7	6	1
mindy188	21	7	14
mindy191	14	7	7
mindy192	21	7	14
mindy193	14	11	3
mindy194	30	2	28
mindy196	36	29	7
mindy197	11	10	1
mindy198	7	4	3
mindy202	14	12	2
mindy204	35	7	28
mindy206	35	7	28
mindy210	2	1	1
mindy211	3	2	1
mindy214	4	1	3
mindy215	7	6	1
mindy221	32	31	1
mindy222	14	11	3
mindy223	16	2	14
mindy224	11	10	1
mindy226	64	7	57
mindy234	12	7	5
mindy236	14	7	7
mindy237	10	2	8
mindy239	14	7	7
mindy240	20	7	13
mindy243	17	10	7
mindy248	4	1	3
mindy249	3	1	2
mindy250	7	1	6
